# Supplementary material
Source: MDPI journal article supplement (https://www.mdpi.com/2071-1050/12/11/4402)
Supplement: s1 [file s1]

## Supplementary Material

**Table S1.** Nomenclature

| $\rho$    | Density, kg/m <sup>3</sup> .                  |
|-----------|-----------------------------------------------|
| $A$       | Coefficient.                                  |
| $C$       | Thermal capacitance, J/°C.                    |
| $c_p$     | Specific heat capacity, J/kg-°C.              |
| $E$       | Energy capacity of the battery, kWh.          |
| $EIR$     | Energy input ratio, $w/w$ .                   |
| $EIRMod$  | Modifier for HVAC EIR.                        |
| $G$       | Received solar irradiance, W/m <sup>2</sup> . |
| $P_C$     | Power charged from the battery, W.            |
| $P_D$     | Power discharged from the battery, W.         |
| $P_{PV}$  | Output power from PV, W.                      |
| $P_R$     | Power rating of PV, W.                        |
| $Q$       | Heat, W.                                      |
| $QMod$    | Modifier for HVAC capacity.                   |
| $R$       | Thermal resistance, °C/W.                     |
| $SOC$     | State of charge, %.                           |
| $T$       | Temperature, °C.                              |
| $t$       | Time, s.                                      |
| $\dot{V}$ | Volume flow rate, m <sup>3</sup> /s.          |
| $v$       | Velocity, m/s.                                |

To gain access to the models, test-bed code, the application software, and data (test results), please contact [ozmeno@ornl.gov](mailto:ozmeno@ornl.gov).
